# Supplementary material
Source: publisher site journal article supplement (https://www.dovepress.com/get_supplementary_file.php?f=308744.docx)
Supplement: Supplementary file 1 [file get_supplementary_file.php]

Appendix A. MEDLINE/Embase Search Strings and Results

| Topic | Set | String | Results |
| --- | --- | --- | --- |
| Invasive mold infection search | S1 | TI,AB((invasive OR systemic OR opportunistic) NEAR/3 (mold OR molds OR mould OR moulds OR mycosis)) OR TI,AB(mucor OR mucormycosis OR zygomycosis OR aspergillus OR aspergillosis) | 121 205 |
| Treatment search | S2 | MESH.EXACT("Voriconazole") OR EMB.EXACT("isavuconazole") OR EMB.EXACT("voriconazole") OR TI,AB(voriconzole OR Vfend OR isavuconazole OR isavuconazonium sulfate OR Cresemba) | 20 373a |
| Economic burden search: costs | S3 | MESH.EXACT(“Cost of Illness” OR “Economics, Pharmaceutical” OR “Fees and Charges” OR “Economics, Nursing”) OR MESH.EXACT.EXPLODE(“Health Care Costs” OR “Health Expenditures” OR “Economics, Medical”) OR EMB.EXACT(“cost of illness” OR “drug cost”) OR EMB.EXACT.EXPLODE(“health care cost”) OR TI,AB(cost* NEAR/3 (medical OR direct OR indirect OR drug OR pharmaceutical OR hospital OR emergency OR outpatient OR inpatient OR ambulatory OR "primary care" OR practitioner OR device OR informal OR economic OR societal OR intangible OR caregiver OR physician OR specialist OR healthcare OR "health care" OR annual* OR clinic)) OR TI,AB(burden NEAR/3 (cost OR costs OR economic OR economics OR caregiver OR family OR families OR society OR societal)) OR TI,AB(impact NEAR/3 (cost OR costs OR economic OR economics OR caregiver OR family OR families OR society OR societal)) | 619 714a |
| Economic burden search: productivity | S4 | MESH.EXACT(“Employer Health Costs” OR “Efficiency” OR “Presenteeism” OR “Absenteeism”) OR MESH.EXACT.EXPLODE("Salaries and Fringe Benefits") OR EMB.EXACT(“productivity” OR “medical leave” OR “presenteeism” OR “absenteeism”) OR EMB.EXACT.EXPLODE(“salary and fringe benefit”) OR TI,AB(“absenteeism” OR “presenteeism” OR “sick day” OR “sick leave” OR “work absence” OR “work incapacity” OR “sickness absence” OR “disability absence” OR “work leave”) OR TI,AB(burden NEAR/3 (employee OR employer)) OR TI,AB(impact NEAR/3 (employee OR employer)) OR (TI,AB(los*) AND TI,AB(work) AND TI,AB(day)) | 168 133a |
| Economic burden search: resource use | S5 | TI,AB((resource OR healthcare OR "health care") NEAR/5 (use OR utilization OR utilisation)) OR TI,AB((visit* OR admission* OR readmission* OR re-admission* OR stay* OR day*) NEAR/3 (physician OR emergency OR specialist OR outpatient OR inpatient OR "primary care" OR practitioner OR hospital OR clinic)) OR TI,AB(hospitalization* OR hospitalisation* OR "length of stay" OR "LOS") | 1 146 520a |
| Clinical burden and risk factors search | S6 | MESH.EXACT(Morbidity OR Mortality OR Incidence) OR MESH.EXACT.EXPLODE("Recurrence" OR "Disease Progression") OR EMB.EXACT(morbidity OR mortality OR incidence) OR EMB.EXACT.EXPLODE("disease exacerbation" OR "recurrent disease") OR TI,AB(incidence OR risk OR survival OR morbidity OR mortality OR "clinical burden" OR "treatment burden" OR "disease burden" OR sequelae OR sequela OR complication OR complications OR toxicity OR toxicities OR progression OR exacerbation OR "clinical outcome" OR "clinical outcomes") | 11 652 224a |
| Publication type search | S7 | EMB.EXACT(editorial OR “case report” OR letter OR note) OR DTYPE("Editorial" OR "Comment" OR "Letter" OR "Case Reports" OR "News" OR "Newspaper Article") OR TI,AB(“case study” or “case studies” OR “case report*” OR “case series”) | 8 936 055a |
| Combined economic burden search | S8 | S1 AND (S3 OR S4 OR S5) | 1978b |
| Combined clinical burden search | S9 | S1 AND S2 AND S6 | 3217a |
| Total economic or clinical citations | S10 | S8 OR S9 | 6011a |
| Journal articles and conference abstracts only | S11 | S10 NOT S7 | 3691a |
| Journal articles only | S12 | S11 NOT (rtype.exact("Conference Abstract")) | 2610a |
| Limit publication date | S13 | S12 AND pd(>20071231) | 1778b |
| Journal articles of interest | S14 | S13 AND LA(English) | 1658b |
| Conference abstracts only | S15 | S11 AND (rtype.exact("Conference Abstract")) | 1082b |
| Limit conference publication date | S16 | S15 AND pd(>20141231) | 391b |
| Conference abstracts of interest | S17 | TIMM, EHA, and ASH | 88b |
| SLRs and meta-analyses | S18 | EMB.EXACT(“meta analysis” OR “meta analysis as topic” OR “systematic review”) OR MESH.EXACT(“Meta-Analysis” OR “Meta-Analysis as Topic” OR “Review, Systematic”) OR TI,AB(“meta analysis” OR “meta-analysis” OR “systematic literature review” OR “systematic review”) | 535 888a |
| Clinical SLR with no drug limits | S19 | S1 and S6 and S18 | 261 a |
| Limit articles (SLRs/MAs) only | S20 | S18 NOT (rtype.exact("Conference Abstract")) | 199b |
| Limit publication date | S21 | S19 AND pd(>20071231) AND LA(English) | 142b |
| All economic and/or clinical burden articles, including SLR/Mas | S22 | S14 OR S21 | 1760b |
| a Duplicates are removed from the search, but included in the result count.  b Duplicates are removed from the search and from the result count. | | | |

Appendix B. Summary of Articles Included in the Systematic Review

| Author, Year | Study Design | Data Source | Region | Mold Type |
| --- | --- | --- | --- | --- |
| Alothman, 2017[1] | Retrospective | Chart review | AfME | IA |
| Alshabani, 2015[2] | Systematic Lit Review | Medline, PubMed | Global | IA |
| Bitterman, 2018[3] | Prospective | Chart Review | AfME | IA |
| Barberan, 2012a[4] | Retrospective case control | Clinical records | Europe | IA |
| Barberan, 2012b[5] | Retrospective | Clinical records | Europe | IA |
| Bozorgi, 2016[6] | Retrospective | Chart review | AfME | IM |
| Cook, 2018[7] | Retrospective, Prospective | Case-control Chart review | US | IA |
| Davies, 2014[8] | Retrospective | Database analysis | US | IA |
| Er Dedekarginoglu, 2017[9] | Retrospective | Database analysis | AfME | IA |
| Erdmann, 2016[10] | Prospective | Observation | Europe | IA |
| Ghanaat, 2017[11] | Retrospective | Chart review | US | IA |
| Guinea, 2017[12] | Retrospective | Hospital records | Europe | IM |
| Ibrahim, 2009[13] | Economic model | Chart review | US | IM |
| Kim, 2011[14] | Retrospective | Registry | US | IA |
| Kontoyiannis, 2016[15] | Retrospective | database | US | IM |
| Lortholary, 2011[16] | Prospective | hosptial records | Europe | IA |
| Moreira, 2016[17] | Systematic Lit Review | PubMed | Global | IM |
| Xu, 2012[18] | Retrospective | Chart Review | APAC | IA |
| Barberán, 2014[19] | Retrospective | Chart Review | Europe | IA |
| Barchiesi, 2015[20] | Retrospective | Case Reports | Global | IA |
| Burghi, 2011[21] | Retrospective | Medical charts | Europe | IA |
| Cho, 2017[22] | Retrospective | Hospital records | APAC | IA |
| Dai, 2013[23] | Retrospective | Hospital computerized medical records database | APAC | IA |
| Delsuc, 2015[24] | Retrospective | Database + chart review | Europe | IA |
| Feng, 2018[25] | Retrospective, Literature Review | Chart Review, PubMed | APAC | IM |
| Garcia-Vidal, 2015[26] | Retrospective | Chart Review | Europe | IA |
| Hosseini-Moghaddam, 2015[27] | Retrospective | Cohort | Canada | IA |
| Jeong, 2018[28] | Systematic Lit Review | Medline, EMBASE | Global | IM |
| Kennedy, 2016[29] | Retrospective | Observation | Oceania | IM |
| López-Medrano, 2016[30] | Retrospective | Cohort | Europe, US, LatAm | IA |
| Luong, 2014[31] | Retrospective | Cohort | Canada | IA |
| Marty, 2016[32] | Prospective | Patient data & FungiScope databse | Global | IM |
| Muñoz, 2014[33] | Retrospective | Data form | Europe | IA |
| Nakamoto, 2013[34] | Retrospective | Medical records (and sometimes telephone interviews) | APAC | IA |
| Russo, 2011[35] | Prospective | Observation | Europe | IA |
| Vehreschild, 2015[36] | Prospective | Database + Medical charts | * | IM |
| Tutar, 2013[37] | Retrospective | Chart review | AfME | IA |
| Wessolossky, 2013[38] | Retrospective | Registry | US | IA |
| Wu, 2012[39] | Retrospective | Chart Review | APAC | IA |
| Zhang, 2018[40] | Retrospective | Chart Review | APAC | IA |
| Cho, 2015[41] | Retrospective | Hospital records | APAC | IA |
| Kyvernitakis, 2015[42] | Retrospective | Databases + medical records | US | IM |
| Shadrivova, 2017[43] | Prospective | Chart Review | Europe | IA |
| Podkovalnikov, 2017[44] | Prospective | Chart Review | Europe | IA |
| Bentvelsen, 2017[45] | Retrospective | Chart Review | Europe | IA |
| Chudinovskikh, 2017[46] | Prospective | Chart Review | Europe | IA |

Abbreviations: AfME, Africa and Middle East; US, United States; APAC, Asia Pacific

Appendix C. ICD-9 and ICD-10 Code Listing

| Term | ICD-9 Code | ICD-10 Code |
| --- | --- | --- |
| Invasive Aspergillosis | 117.3, 117.9, 484.6, 518.6 | B44.0, B44.1, B44.2, B44.7, B44.81, B44.89, B44.9, B48.3, B48.4, B48.8, B49 |
| Invasive Mucormycosis | 117.7 | B46.x |
| Diabetes | 250.0-250.9 | El0.0- E10.9, Ell.0-E11.9, E12.0-E12.9, E13.0- E13.9, E14.0-E14.9 |
| Lung Disease | 416.8, 416.9, 490.x-505.x, 506, 506.4, 508.1, 508.8, 277.00, 277.01, 277.03, 277.09, 010.xx, 011.xx, 012.xx, 018.xx | I27.20, I27.21, I27.22, I27.23, I27.24, I27.29, I27.81, I27.89, I27.9, J40, J41.0, J41.1, J41.8, J42, J43.0, J43.1, J43.2, J43.8, J43.9, J44.0, J44.1, J44.9, J45.20, J45.21, J45.22, J45.30, J45.31, J45.32, J45.40, J45.41, J45.42, J45.50, J45.51, J45.52, J45.901, J45.902, J45.909, J45.990, J45.991, J45.998, J47.0, J47.1, J47.9, J60, J61, J62.0, J62.8, J63.0, J63.1, J63.2, J63.3, J63.4, J63.5, J63.6, J64, J65, J66.0, J66.1, J66.2, J66.8, J67.0, J67.1, J67.2, J67.3, J67.4, J67.5, J67.6, J67.7, J67.8, J67.9, J68.4, J70.1, J70.2, J70.3, J70.4, J70.8, E84.9, E84.11, E84.0, E84.19, E84.8, A15.7, A15.6, A15.0, A15.5, A15.4, A15.8, A15.9, A19.0, A19.1, A19.2, A19.8, A19.9 |
| Solid Organ Transplant (SOT) | V42.0, V42.1, V42.6, V42.7, V42.83, 996.81, 996.83, 996.84, 996.82, 996.86, 996.87, 996.89, 37.51, 50.59, 33.50, 33.51, 33.52, 33.6, 55.69 | 02YA0Z0, 02YA0Z1, 02YA0Z2, 0BYC0Z0, 0BYC0Z1, 0BYC0Z2, 0BYD0Z0, 0BYD0Z1, 0BYD0Z2, 0BYF0Z0, 0BYF0Z1, 0BYF0Z2, 0BYG0Z0, 0BYG0Z1, 0BYG0Z2, 0BYH0Z0, 0BYH0Z1, 0BYH0Z2, 0BYJ0Z0, 0BYJ0Z1, 0BYJ0Z2, 0BYK0Z0, 0BYK0Z1, 0BYK0Z2, 0BYL0Z0, 0BYL0Z1, 0BYL0Z2, 0BYM0Z0, 0BYM0Z1, 0BYM0Z2, 0FY00Z0, 0FY00Z1, 0FY00Z2, 0TY00Z0, 0TY00Z1, 0TY00Z2, 0TY10Z0, 0TY10Z1, 0TY10Z2, T86.10, T86.11, T86.12, T86.13, T86.19, T86.20, T86.21, T86.22, T86.23, T86.290, T86.298, T86.30, T86.31, T86.32, T86.33, T86.39, T86.40, T86.41, T86.42, T86.43, T86.49, T86.810, T86.811, T86.812, T86.818, T86.819, T86.830, T86.831, T86.832, T86.838, T86.839, T86.850, T86.851, T86.852, T86.858, T86.859, T86.890, T86.891, T86.892, T86.898, T86.899, Z48.21, Z48.22, Z48.23, Z48.24, Z48.280, Z94.0, Z94.1, Z94.2, Z94.3, Z94.4, Z94.83 |
| Hematological/Oncological Malignancies | 200-208, 238.71, 238.76, V10.6x | C83.30, C83.39, C83.31, C83.32, C83.33, C83.34, C83.35, C83.36, C83.37, C83.38, C83.50, C83.59, C83.51, C83.52, C83.53, C83.54, C83.55, C83.56, C83.57, C83.58, C83.70, C83.79, C83.71, C83.72, C83.73, C83.74, C83.75, C83.76, C83.77, C83.78, C83.80, C83.89, C88.4, C83.81, C83.82, C83.83, C83.84, C83.85, C83.86, C83.87, C83.88, C83.10, C83.19, C83.11, C83.12, C83.13, C83.14, C83.15, C83.16, C83.17, C83.18, C84.60, C84.69, C84.70, C84.79, C84.61, C84.71, C84.62, C84.72, C84.63, C84.73, C84.64, C84.74, C84.65, C84.75, C84.66, C84.76, C84.67, C84.77, C84.68, C84.78, C83.30, C85.20, C85.29, C85.21, C85.22, C85.23, C85.24, C85.25, C85.26, C85.27, C85.28, C83.00, C83.09, C83.90, C83.99, C86.5, C86.6, C83.01, C83.91, C83.02, C83.92, C83.03, C83.93, C83.04, C83.94, C83.05, C83.95, C83.06, C83.96, C83.07, C83.97, C83.08, C83.98, C81.70, C81.79, C81.71, C81.72, C81.73, C81.74, C81.75, C81.76, C81.77, C81.78, C81.99, C81.91, C81.92, C81.93, C81.94, C81.95, C81.96, C81.97, C81.98, C81.00, C81.09, C81.40, C81.49, C81.01, C81.41, C81.02, C81.42, C81.03, C81.43, C81.04, C81.44, C81.05, C81.45, C81.06, C81.46, C81.07, C81.47, C81.08, C81.48, C81.10, C81.19, C81.11, C81.12, C81.13, C81.14, C81.15, C81.16, C81.17, C81.18, C81.20, C81.29, C81.21, C81.22, C81.23, C81.24, C81.25, C81.26, C81.27, C81.28, C81.30, C81.39, C81.31, C81.32, C81.33, C81.34, C81.35, C81.36, C81.37, C81.38, C81.90, C82.00, C82.09, C82.10, C82.19, C82.20, C82.29, C82.30, C82.39, C82.40, C82.49, C82.60, C82.69, C82.80, C82.89, C82.90, C82.99, C82.01, C82.11, C82.21, C82.31, C82.41, C82.61, C82.81, C82.91, C82.02, C82.12, C82.22, C82.32, C82.42, C82.62, C82.82, C82.92, C82.03, C82.13, C82.23, C82.33, C82.43, C82.63, C82.83, C82.93, C82.04, C82.14, C82.24, C82.34, C82.44, C82.64, C82.84, C82.94, C82.05, C82.15, C82.25, C82.35, C82.45, C82.65, C82.85, C82.95, C82.06, C82.16, C82.26, C82.36, C82.46, C82.66, C82.86, C82.96, C82.07, C82.17, C82.27, C82.37, C82.47, C82.67, C82.87, C82.97, C82.08, C82.18, C82.28, C82.38, C82.48, C82.68, C82.88, C82.98, C84.00, C84.09, C84.01, C84.02, C84.03, C84.04, C84.05, C84.06, C84.07, C84.08, C84.10, C84.19, C84.11, C84.12, C84.13, C84.14, C84.15, C84.16, C84.17, C84.18, C96.A, C91.40, C91.41, C91.42, C96.0, C96.20, C96.21, C96.22, C96.29, C84.40, C84.49, C84.41, C84.42, C84.43, C84.44, C84.45, C84.46, C84.47, C84.48, C82.50, C82.59, C84.90, C84.99, C84.A0, C84.A9, C84.Z0, C84.Z9, C85.10, C85.19, C85.80, C85.89, C85.90, C85.99, C86.4, C82.51, C84.91, C84.A1, C84.Z1, C85.11, C85.81, C85.91, C86.0, C82.52, C84.92, C84.A2, C84.Z2, C85.12, C85.82, C85.92, C82.53, C84.93, C84.A3, C84.Z3, C85.13, C85.83, C85.93, C86.2, C86.3, C82.54, C84.94, C84.A4, C84.Z4, C85.14, C85.84, C85.94, C82.55, C84.95, C84.A5, C84.Z5, C85.15, C85.85, C85.95, C82.56, C84.96, C84.A6, C84.Z6, C85.16, C85.86, C85.96, C82.57, C84.97, C84.A7, C84.Z7, C85.17, C85.87, C85.97, C86.1, C82.58, C84.98, C84.A8, C84.Z8, C85.18, C85.88, C85.98, C96.4, C96.9, C96.Z, C90.00, C90.01, C90.02, C90.10, C90.11, C90.12, C88.2, C88.3, C88.8, C88.9, C90.20, C90.30, C90.21, C90.31, C90.22, C90.32, C91.00, C91.01, C91.02, C91.10, C91.90, C91.11, C91.12, C91.Z0, C91.Z1, C91.Z2, C91.30, C91.50, C91.60, C91.A0, C91.31, C91.51, C91.61, C91.A1, C91.32, C91.52, C91.62, C91.A2, C91.91, C91.92, C92.00, C92.40, C92.50, C92.60, C92.90, C92.A0, C92.01, C92.41, C92.51, C92.61, C92.91, C92.A1, C92.02, C92.42, C92.52, C92.62, C92.92, C92.A2, C92.10, C92.11, C92.12, C92.20, C92.Z0, C92.21, C92.Z1, C92.22, C92.Z2, C92.30, C92.31, C92.32, C93.00, C93.01, C93.02, C93.10, C93.11, C93.12, C93.90, C93.91, C93.92, C93.30, C93.Z0, C93.31, C93.Z1, C93.32, C93.Z2, C94.00, C94.01, C94.02, D45, L53.8, C94.20, C94.21, C94.22, C94.30, C94.80, C94.31, C94.81, C94.32, C94.82, C95.00, C95.01, C95.02, C95.10, C95.11, C95.12, C95.90, C95.91, C95.92, D47.3, D47.1, D47.4, Z85.6 |

|  |  | Diabetes | | | | HEM/ONC | | | | Lung | | | | | SOT | | | | | |
| --- | --- | --- | --- | --- | --- | --- | --- | --- | --- | --- | --- | --- | --- | --- | --- | --- | --- | --- | --- | --- |
| **Characteristics** | | **Invasive Aspergillosis N = 23578** | | **Invasive Mucormycosis N = 2257** | | **Invasive Aspergillosis N = 10638** | | **Invasive Mucormycosis N = 1133** | | **Invasive Aspergillosis N = 42939** | | **Invasive Mucormycosis N = 3264** | | | **Invasive Aspergillosis N = 2536** | | | **Invasive Mucormycosis N = 144** | | |
|  | | **N/Stat 1** | **%/Stat 2** | **N/Stat 1** | **%/Stat 2** | **N/Stat 1** | **%/Stat 2** | **N/Stat 1** | **%/Stat 2** | **N/Stat 1** | **%/Stat 2** | **N/Stat 1** | **%/Stat 2** | | **N/Stat 1** | **%/Stat 2** | | **N/Stat 1** | **%/Stat 2** | |
| Age | | | | | | | | | |  |  |  | |  |  | |  |  | |  |
|  | First Quartile/Third Quartile | 51 | 70.00 | 51 | 66.00 | 41 | 67.00 | 45 | 67.00 | 42 | 68.00 | 49 | 68.00 | | 45 | 64.00 | | 44 | 62.00 | |
|  | Median/IQR | 61 | 19.00 | 58 | 15.00 | 56 | 26.00 | 58 | 22.00 | 57 | 26.00 | 59 | 19.00 | | 56 | 19.00 | | 54 | 18.00 | |
| Age group | | | | | | | | | |  |  |  | |  |  | |  |  | |  |
|  | 0-12 | 77 | 0.33 | 7 | 0.31 | 506 | 4.76 | 40 | 3.53 | 1504 | 3.50 | 61 | 1.87 | | 33 | 1.30 | | 4 | 2.78 | |
|  | 13-17 | 132 | 0.56 | 5 | 0.22 | 253 | 2.38 | 13 | 1.15 | 925 | 2.15 | 21 | 0.64 | | 43 | 1.70 | | 1 | 0.69 | |
|  | 18-39 | 2165 | 9.18 | 143 | 6.34 | 1762 | 16.56 | 139 | 12.27 | 6964 | 16.22 | 307 | 9.41 | | 367 | 14.47 | | 23 | 15.97 | |
|  | 40-64 | 11891 | 50.43 | 1430 | 63.36 | 4935 | 46.39 | 601 | 53.05 | 19730 | 45.95 | 1794 | 54.96 | | 1527 | 60.21 | | 95 | 65.97 | |
|  | 65+ | 9311 | 39.49 | 671 | 29.73 | 3181 | 29.90 | 340 | 30.01 | 13814 | 32.17 | 1080 | 33.09 | | 566 | 22.32 | | 21 | 14.58 | |
| Gender | | | | | | | | | |  |  |  | |  |  | |  |  | |  |
|  | Female | 12871 | 54.59 | 1080 | 47.85 | 5777 | 54.31 | 644 | 56.84 | 25923 | 60.37 | 1835 | 56.22 | | 1041 | 41.05 | | 61 | 42.36 | |
|  | Male | 10691 | 45.34 | 1175 | 52.06 | 4851 | 45.60 | 489 | 43.16 | 16989 | 39.57 | 1429 | 43.78 | | 1493 | 58.87 | | 83 | 57.64 | |
| Race | | | | | | | | | |  |  |  | |  |  | |  |  | |  |
|  | African American | 3106 | 13.17 | 261 | 11.56 | 814 | 7.65 | 84 | 7.41 | 4243 | 9.88 | 280 | 8.58 | | 275 | 10.84 | | 25 | 17.36 | |
|  | Asian | 373 | 1.58 | 27 | 1.20 | 148 | 1.39 | 14 | 1.24 | 536 | 1.25 | 27 | 0.83 | | 61 | 2.41 | | 2 | 1.39 | |
|  | Caucasian | 18383 | 77.97 | 1842 | 81.61 | 9022 | 84.81 | 968 | 85.44 | 35671 | 83.07 | 2806 | 85.97 | | 2002 | 78.94 | | 106 | 73.61 | |
| Ethnicity | | | | | | | | | |  |  |  | |  |  | |  |  | |  |
|  | Hispanic | 1554 | 6.59 | 109 | 4.83 | 436 | 4.10 | 52 | 4.59 | 1549 | 3.61 | 85 | 2.60 | | 202 | 7.97 | | 18 | 12.50 | |
|  | Not Hispanic | 20499 | 86.94 | 2080 | 92.16 | 9616 | 90.39 | 1035 | 91.35 | 38875 | 90.54 | 3089 | 94.64 | | 2196 | 86.59 | | 119 | 82.64 | |

Appendix D. Demographic data is for IA and IM infected patients in the diabetes, lung, HEM/ONC, and SOT comorbidity cohorts

References

1. Alothman, A.F., et al., *Burden and treatment patterns of invasive fungal infections in hospitalized patients in the Middle East: Real-world data from Saudi Arabia and Lebanon.* Infection and drug resistance, 2017. **10**: p. 35.

2. Alshabani, K., et al., *Invasive pulmonary aspergillosis in patients with influenza infection: report of two cases and systematic review of the literature.* Expert review of respiratory medicine, 2015. **9**(1): p. 89-96.

3. Bitterman, R., et al., *Baseline chest computed tomography for early diagnosis of invasive pulmonary aspergillosis in patients with hematologic malignancies undergoing intensive chemotherapy.* 2018.

4. Barberan, J., et al., *Repeated Aspergillus isolation in respiratory samples from non-immunocompromised patients not selected based on clinical diagnoses: colonisation or infection?* BMC infectious diseases, 2012. **12**(1): p. 295.

5. Barberan, J., et al., *Clinical features of invasive pulmonary aspergillosis vs. colonization in COPD patients distributed by gold stage.* Journal of Infection, 2012. **65**(5): p. 447-452.

6. Bozorgi, V., et al., *Epidemiological aspects and clinical outcome of patients with Rhinocerebral zygomycosis: a survey in a referral hospital in Iran.* Pan African Medical Journal, 2016. **24**(1).

7. Cook, J.C., et al., *A case-control study of the risk factors for developing aspergillosis following cardiac transplant.* Clinical Transplantation, 2018. **32**(9): p. e13367.

8. Davies, S., et al., *Aspergillus infections in transplant and non-transplant surgical patients.* Surgical infections, 2014. **15**(3): p. 207-212.

9. Er, B.D., et al., *Culture-Positive Pulmonary Aspergillosis Infection: Clinical and Laboratory Features of Solid-Organ Transplant Recipients.* Experimental and clinical transplantation: official journal of the Middle East Society for Organ Transplantation, 2017. **15**(Suppl 1): p. 214-218.

10. Erdmann, J.H., et al., *Anti‐Aspergillus immunoglobulin‐G testing in serum of hematopoietic stem cell transplant recipients.* Transplant Infectious Disease, 2016. **18**(3): p. 354-360.

11. Ghanaat, F. and J.A. Tayek, *Weight loss and diabetes are new risk factors for the development of invasive aspergillosis infection in non-immunocompromized humans.* Clinical practice (London, England), 2017. **14**(5 Spec Iss): p. 296.

12. Guinea, J., et al., *Increasing incidence of mucormycosis in a large Spanish hospital from 2007 to 2015: Epidemiology and microbiological characterization of the isolates.* PloS one, 2017. **12**(6): p. e0179136.

13. Ibrahim, A.S., et al., *Economic burden of mucormycosis in the United States: can a vaccine be cost-effective?* Medical mycology, 2009. **47**(6): p. 592-600.

14. Kim, A., D.P. Nicolau, and J.L. Kuti, *Hospital costs and outcomes among intravenous antifungal therapies for patients with invasive aspergillosis in the United States.* Mycoses, 2011. **54**(5): p. e301-e312.

15. Kontoyiannis, D.P., et al., *Prevalence, clinical and economic burden of mucormycosis-related hospitalizations in the United States: a retrospective study.* BMC infectious diseases, 2016. **16**(1): p. 730.

16. Lortholary, O., et al., *Epidemiological trends in invasive aspergillosis in France: the SAIF network (2005–2007).* Clinical Microbiology and Infection, 2011. **17**(12): p. 1882-1889.

17. Moreira, J., et al., *The burden of mucormycosis in HIV-infected patients: A systematic review.* Journal of Infection, 2016. **73**(3): p. 181-188.

18. Xu, H., et al., *Invasive pulmonary aspergillosis in patients with chronic obstructive pulmonary disease: a case control study from China.* Clinical Microbiology and Infection, 2012. **18**(4): p. 403-408.

19. Barberán, J.S.-H., Eloy; del Castillo, Daniel; Sanz, Francisco; Alcázar, Bernardino; Malmierca, Eduardo; Ramirez, P.; del Valle, C.; Maestre, J.R.; Perez-Grimaldi, F.; Blanquer, J.; Chanza, M.; Lloret, T.; Cuesta, I.; Acha, V.; Beristain, X.; Briones, M.L.; Navarro, D.; Riera, M.; Martin-Pena, L.; Marinescu, C.; Borrell, N.; Lama, R.; Cause, M.; Merlos, S.; Serra, P.; Garcia-Perez, F.; Fernandez-Calleja, G.; Hernández, J.R.; Martinez-Martinez, L.; Sepulveda, M.A.; Heredero, E.; Granizo, J.J.; Aguilar, L.; Giménez, M.J.; Prieto, J., *Report of 38 cases of tracheobronchitis in non-immunocompromised patients with dual isolation of Aspergillus in lower respiratory tract samples.* Revista Espanola de Quimioterapia, 2014. **27**(2): p. 110-114.

20. Barchiesi, F., et al., *Invasive aspergillosis in liver transplant recipients: epidemiology, clinical characteristics, treatment, and outcomes in 116 cases.* Liver Transplantation, 2015. **21**(2): p. 204-212.

21. Burghi, G., et al., *Outcomes of mechanically ventilated hematology patients with invasive pulmonary aspergillosis.* Intensive care medicine, 2011. **37**(10): p. 1605.

22. Cho, S.-Y.L., Dong-Gun; Choi, Jae-Ki; Lee, Hyo-Jin; Kim, Si-Hyun; Park, Sun Hee; Choi, Su-Mi; Choi, Jung-Hyun; Yoo, Jin-Hong; Park, Yeon-Joon; Lee, Jong-Wook, *Characteristics of culture-positive invasive pulmonary aspergillosis in patients with hematologic diseases: Comparison between Aspergillus fumigatus and non-fumigatus Aspergillus species.* Medicine (United States), 2017. **96**(49).

23. Dai, Z.Z., Haijin; Cai, Shaoxi; Lv, Yanhua; Tong, Wancheng, *Invasive pulmonary aspergillosis in non-neutropenic patients with and without underlying disease: A single-centre retrospective analysis of 52 subjects.* Respirology, 2013. **18**(2): p. 323-331.

24. Delsuc, C.C., Aurélie; Frealle, Emilie; Bienvenu, Anne-Lise; Dessein, Rodrigue; Jarraud, Sophie; Dumitrescu, Oana; Le Maréchal, Marion; Wallet, Florent; Friggeri, Arnaud; Argaud, Laurent; Rimmelé, Thomas; Nseir, Saad; Ader, Florence, *Putative invasive pulmonary aspergillosis in critically ill patients with chronic obstructive pulmonary disease: A matched cohort study.* Critical Care, 2015. **19**(1).

25. Feng, J.S., Xuefeng, *Characteristics of pulmonary mucormycosis and predictive risk factors for the outcome.* Infection and drug resistance, 2018. **46**(4): p. 503-512.

26. Garcia-Vidal, C.P., Maddalena; Cervera, Carlos; Gudiol, Carlota; Ruiz-Camps, Isabel; Moreno, Asunción; Royo-Cebrecos, Cristina; Roselló, Eva; De La Bellacasa, Jordi Puig; Ayats, Josefina; Carratalà, Jordi, *Causes of death in a contemporary cohort of patients with invasive aspergillosis.* PLoS ONE, 2015. **10**(3).

27. Hosseini-Moghaddam, S.M.C., Cecilia; Luong, Me-Linh; Azad, Sassan; Singer, Lianne G.; Mazzulli, Tony; Rotstein, Coleman; Keshavjee, Shaf; Husain, Shahid, *The effectiveness of culture-directed preemptive anti-aspergillus treatment in lung transplant recipients at one year after transplant.* Transplantation, 2015. **99**(11): p. 2387-2393.

28. Jeong, W.K., C.; Wolfe, R.; Lee, W.L.; Slavin, M.A.; Kong, D.C.M.; Chen, S.C.-A., *The epidemiology and clinical manifestations of mucormycosis: a systematic review and meta-analysis of case reports.* Clinical Microbiology and Infection, 2018: p. 1-9.

29. Kennedy, K.J.D., K.; Slavin, M.A.; van Hal, S.J.; Sorrell, T.C.; Lee, A.; Marriott, D.J.; Chapman, B.; Halliday, C.L.; Hajkowicz, K.; Athan, E.; Bak, N.; Cheong, E.; Heath, C.H.; Morrissey, C.O.; Kidd, S.; Beresford, R.; Blyth, C.; Korman, T.M.; Robinson, J.O.; Meyer, W.; Chen, S.C.-A.; Clark, Julia; McCormack, Joseph; Looke, David; Playford, E. Geoffrey; Chen, Sharon; Gottlieb, Thomas; Halliday, Catriona; Marriott, Deborah; McMullan, Brendan; Meyer, Wieland; Sorrell, Tania; van Hal, Sebastian; Ananda-Rajah, Michelle; Morrissey, C. Orla; Slavin, Monica; Bak, Narin; Kidd, Sarah; Arthur, Ian; Blyth, Christopher; Heath, Christopher; Kennedy, Karina; Daveson, Kathryn; Morris, Arthur; Chambers, Steve, *Mucormycosis in Australia: contemporary epidemiology and outcomes.* Clinical Microbiology and Infection, 2016. **22**(9): p. 775-781.

30. López-Medrano, F.F.-R., M.; Silva, J.T.; Carver, P.L.; van Delden, C.; Merino, E.; Pérez-Saez, M.J.; Montero, M.; Coussement, J.; de Abreu Mazzolin, M.; Cervera, C.; Santos, L.; Sabé, N.; Scemla, A.; Cordero, E.; Cruzado-Vega, L.; Martín-Moreno, P.L.; Len, Ó.; Rudas, E.; de León, A.P.; Arriola, M.; Lauzurica, R.; David, M.; González-Rico, C.; Henríquez-Palop, F.; Fortún, J.; Nucci, M.; Manuel, O.; Paño-Pardo, J.R.; Montejo, M.; Muñoz, P.; Sánchez-Sobrino, B.; Mazuecos, A.; Pascual, J.; Horcajada, J.P.; Lecompte, T.; Moreno, A.; Carratalà, J.; Blanes, M.; Hernández, D.; Fariñas, M.C.; Andrés, A.; Aguado, J.M., *Clinical Presentation and Determinants of Mortality of Invasive Pulmonary Aspergillosis in Kidney Transplant Recipients: A Multinational Cohort Study.* American Journal of Transplantation, 2016. **16**(11): p. 3220-3234.

31. Luong, M.-L.C., Cecilia; Stephenson, Anne; Rotstein, Coleman; Singer, Lianne G.; Waters, Valerie; Azad, Sassan; Keshavjee, Shaf; Tullis, Elizabeth; Husain, Shahid, *Pretransplant aspergillus colonization of cystic fibrosis patients and the incidence of post-lung transplant invasive aspergillosis.* Transplantation, 2014. **97**(3): p. 351-357.

32. Marty, F.M.O.-Z., Luis; Cornely, Oliver A.; Mullane, Kathleen M.; Perfect, John R.; Thompson, George R.; Alangaden, George J.; Brown, Janice M.; Fredricks, David N.; Heinz, Werner J.; Herbrecht, Raoul; Klimko, Nikolai; Klyasova, Galina; Maertens, Johan A.; Melinkeri, Sameer R.; Oren, Ilana; Pappas, Peter G.; Ráčil, Zdeněk; Rahav, Galia; Santos, Rodrigo; Schwartz, Stefan; Vehreschild, J. Janne; Young, Jo-Anne H.; Chetchotisakd, Ploenchan; Jaruratanasirikul, Sutep; Kanj, Souha S.; Engelhardt, Marc; Kaufhold, Achim; Ito, Masanori; Lee, Misun; Sasse, Carolyn; Maher, Rochelle M.; Zeiher, Bernhardt; Vehreschild, Maria J.G.T., *Isavuconazole treatment for mucormycosis: A single-arm open-label trial and case-control analysis.* The Lancet Infectious Diseases, 2016. **16**(7): p. 828-837.

33. Muñoz, P.C., Ines; Valerio, Maricela; Palomo, Jesús; Villa, Adolfo; Eworo, Alia; Fernández-Yáñez, Juan; Guinea, Jesús; Bouza, Emilio, *Invasive aspergillosis among heart transplant recipients: A 24-year perspective.* Journal of Heart and Lung Transplantation, 2014. **33**(3): p. 278-288.

34. Nakamoto, K.T., Noboru; Kanauchi, Tetsu; Ishiguro, Takashi; Yanagisawa, Tsutomu; Sugita, Yutaka, *Prognostic factors in 194 patients with chronic necrotizing pulmonary aspergillosis.* Internal Medicine, 2013. **52**(7): p. 727-734.

35. Russo, A.F., M.; Vena, A.; Venditti, C.; Mancini, C.; Morelli, A.; Venditti, M., *Alinvasive pulmonary aspergillosis in non-neutropenic patients: Analysis of a 14-month prospective clinical experience.* Journal of Chemotherapy, 2011. **23**(5): p. 290-294.

36. Vehreschild, M.J.G.T.V., J.J.; Marty, F.M.; Perfect, J.; Ostrosky-Zeichner, L.; Rahav, G.; Zeiher, B.; Lee, M.; Maher, R.; Lovell, C.; Engelhardt, M.; Cornely, O.A., *Primary treatment of invasive mucormycosis (IM) with isavuconazole (VITAL Study) or amphotericin formulations (FungiScope™): Case matched analysis.* Mycoses, 2015. **58**: p. 197.

37. Tutar, N.M., Gokhan; Koç, Ayşe Nedret; Yilmaz, Insu; Bozkurt, Ilkay; Simsek, Zuhal Ozer; Buyukoglan, Hakan; Kanbay, Asiye; Oymak, Fatma Sema; Gulmez, Inci; Demir, Ramazan, *Invasive pulmonary aspergillosis in patients with chronic obstructive pulmonary disease.* Multidisciplinary Respiratory Medicine, 2013. **8**(9).

38. Wessolossky, M., et al., *Invasive Aspergillus infections in hospitalized patients with chronic lung disease.* Infection and drug resistance, 2013. **6**: p. 33-39.

39. Wu, Z.L., Z; Shao, F; Sheng, J; Li, L, *Invasive pulmonary aspergillosis in patients with acute-on-chronic liver failure.* The Journal of international medical research, 2012. **40**(5): p. 1958-65.

40. Zhang, X.Y., Meifang; Hu, Jianhua; Zhao, Hong; Li, Lanjuan, *Epidemiology of invasive pulmonary aspergillosis in patients with liver failure: Clinical presentation, risk factors, and outcomes.* Journal of International Medical Research, 2018. **46**(2): p. 819-827.

41. Cho, S.Y.L., D.; Choi, J.; Lee, H.; Kim, S.H.; Park, S.H.; Choi, S.M.; Choi, J.; Yoo, J., *Outcomes of hematologic patients with invasive aspergillosis before allogeneic stem cell transplantation.* Mycoses, 2015. **58**: p. 161.

42. Kyvernitakis, A.T., H.A.; Jiang, Y.; Chamilos, G.; Lewis, R.E.; Kontoyiannis, D.P., *Initial use of combination treatment does not impact early survival of 106 patients with hematologic malignancies and mucormycosis: A propensity score analysis.* Mycoses, 2015. **58**: p. 166.

43. Shadrivova, O.V.S., M.A.; Desyatik, E.A.; Ignatyeva, S.M.; Zjuzgin, I.S.; Uspenskaya, O.S.; Terskova, T.V.; Popova, M.O.; Volkova, A.G.; Zubarovskaya, L.S.; Afanasyev, B.V.; Klimko, N.N., *Abdominal organs involvement in patients with invasive aspergillosis.* Mycoses, 2017. **60**: p. 160-161.

44. Podkovalnikov, S.L.S., O.V.; Bogomolova, T.S.; Ignatyeva, S.M.; Vasilyeva, N.V.; Klimko, N.N.; Zubarovskaya, L.S.; Afanasyev, B.V., *Invasive aspergillosis of the paranasal sinuses in Saint Petersburg, Russia.* Mycoses, 2017. **60**: p. 167.

45. Bentvelsen, R., et al., *Management and outcome of culture-positive invasive aspergillosis in an area with high prevalence of voriconazole resistance.* 2017.

46. Chudinovskikh, J.A.S., T.U.; Shadrivova, O.V.; Frolova, E.V.; Bogomolova, T.S.; Ignatyeva, S.M.; Alekseev, S.M.; Zuzgin, I.S.; Filatova, L.V.; Motalkina, M.S.; Hadonov, U.B.; Harchenko, E.V.; Oleinik, J.A.; Shilo, P.S.; Klimko, N.N., *Clinical, laboratory and CT scan features of invasive aspergillosis in patients with B-cell lymphoma.* Mycoses, 2017. **60**: p. 174-175.
